# Supplementary material for: Identification and expression characterization of the Phloem Protein 2 (PP2) genes in ramie (Boehmeria nivea L. Gaudich)
Source: PubMed Central journal article supplement (PMC6048116; doi:10.1038/s41598-018-28953-2), 2018-07-16
Supplement: 41598_2018_28953_MOESM1_ESM.pdf [file 41598_2018_28953_MOESM1_ESM.pdf]

## Supplementary Information

### Title

Identification and expression characterization of the Phloem Protein 2 (*PP2*) genes in ramie (*Boehmeria nivea* L.

Gaudich)

### Authors

Pingan Guo<sup>1</sup>

xc-guo12@hotmail.com

Yancheng Zheng<sup>1</sup>

870428051@qq.com

Dingxiang Peng<sup>1</sup>

pdxiang@mail.hzau.edu.cn

Lijun Liu<sup>1</sup>

liulijun@mail.hzau.edu.cn

Lunjin Dai<sup>1</sup>

dailunjin@gmail.com

Cong Chen<sup>1</sup>

chencong1992@webmail.hzau.edu.cn

Bo Wang<sup>1\*</sup>

wangbo@mail.hzau.edu.cn

<sup>1</sup>MOA Key Laboratory of Crop Ecophysiology and Farming System in the Middle Reaches of the Yangtze River, College of Plant Science and Technology, Huazhong Agricultural University, #1 Shizishan Street, Hongshan District, Wuhan 430070, Hubei Province, China, Tel/fax: +86 27 87287136.

\*Corresponding author

**Tab. S1. The fold change of the relative expression level of *BnPP2* genes under different treatment.** Fold change = REL (Treatment) / REL (Control) (REL: relative expression level; LT: low temperature; HT: high temperature; DS: drought stress; MW: mechanical wounding treatment; IF: insect feeding; FI: fungal infection).

| Gene            | Leaf (without main vein) |      |      |       |         |        | Petiole |         |        | Bark    |      |      |       | Stem   |        |      |
|-----------------|--------------------------|------|------|-------|---------|--------|---------|---------|--------|---------|------|------|-------|--------|--------|------|
|                 | LT                       | HT   | DS   | MW    | IF      | FI     | LT      | HT      | DS     | LT      | HT   | DS   | MW    | LT     | HT     | DS   |
| <i>BnPP2-1</i>  | 2.07                     | 3.08 | 0.52 | 0.92  | 30.42   | 7.11   | 0.81    | 18.15   | 10.01  | 9.42    | 0.39 | 1.63 | 0.86  | 1.65   | 0.80   | 2.12 |
| <i>BnPP2-2</i>  | 1.80                     | 1.06 | 2.61 | 0.62  | 84.45   | 14.85  | 0.57    | 7.38    | 18.65  | 12.97   | 0.41 | 0.84 | 0.09  | 0.61   | 0.30   | 0.32 |
| <i>BnPP2-3</i>  | 0.68                     | 2.05 | 0.41 | 0.68  | 5.79    | 12.83  | 0.42    | 10.65   | 16.14  | 6.38    | 0.52 | 1.42 | 0.25  | 1.66   | 1.90   | 2.02 |
| <i>BnPP2-4</i>  | 2.11                     | 2.69 | 0.28 | 0.78  | 19.28   | 3.45   | 0.60    | 10.69   | 2.03   | 6.89    | 0.28 | 0.27 | 0.45  | 1.08   | 0.96   | 0.68 |
| <i>BnPP2-5</i>  | 0.33                     | 0.16 | 0.06 | 0.70  | 3.00    | 6.43   | 2.01    | 64.64   | 9.27   | 212.32  | 0.06 | 2.85 | 5.45  | 0.43   | 0.24   | 1.78 |
| <i>BnPP2-6</i>  | 4.64                     | 4.48 | 0.43 | 1.37  | 17.44   | 4.40   | 2.73    | 61.12   | 2.86   | 29.70   | 1.53 | 0.56 | 0.63  | 7.81   | 6.77   | 0.41 |
| <i>BnPP2-7</i>  | 14.80                    | 6.16 | 1.85 | 1.76  | 576.45  | 116.46 | 0.89    | 32.11   | 21.63  | 51.75   | 0.13 | 5.99 | 0.25  | 0.56   | 1.36   | 6.45 |
| <i>BnPP2-8</i>  | 3.22                     | 1.33 | 3.26 | 2.15  | 2778.25 | 11.69  | 4.21    | 5763.35 | 260.24 | 70.97   | 0.98 | 1.32 | 0.55  | 116.32 | 100.62 | 3.03 |
| <i>BnPP2-9</i>  | 2.86                     | 2.29 | 3.67 | 1.79  | 1381.24 | 21.59  | 0.39    | 11.01   | 26.82  | 27.59   | 0.57 | 0.12 | 0.51  | 48.46  | 46.05  | 0.65 |
| <i>BnPP2-10</i> | 11.81                    | 2.37 | 7.61 | 13.41 | 4364.11 | 20.87  | 0.93    | 38.24   | 19.13  | 275.00  | 1.02 | 1.56 | 1.87  | 4.33   | 2.13   | 2.29 |
| <i>BnPP2-11</i> | 3.05                     | 2.10 | 0.93 | 5.16  | 121.77  | 19.83  | 0.50    | 48.87   | 3.88   | 131.53  | 1.57 | 0.64 | 1.56  | 5.98   | 4.36   | 1.07 |
| <i>BnPP2-12</i> | 7.66                     | 2.54 | 1.23 | 3.87  | 202.26  | 20.54  | 3.26    | 21.11   | 16.20  | 6.85    | 0.07 | 0.09 | 0.28  | 11.83  | 6.21   | 0.04 |
| <i>BnPP2-13</i> | 0.51                     | 0.81 | 2.12 | 1.27  | 143.00  | 11.04  | 0.20    | 17.01   | 7.55   | 30.63   | 0.51 | 1.14 | 1.19  | 3.72   | 1.46   | 1.29 |
| <i>BnPP2-14</i> | 1.60                     | 2.05 | 0.12 | 0.29  | 2.57    | 0.91   | 0.50    | 10.63   | 0.65   | 1.40    | 1.65 | 0.26 | 0.70  | 0.42   | 0.92   | 0.26 |
| <i>BnPP2-15</i> | 10.91                    | 0.84 | 0.46 | 12.37 | 619.60  | 12.19  | 5.60    | 46.48   | 11.86  | 1378.64 | 1.32 | 3.09 | 10.47 | 4.04   | 0.39   | 2.03 |

**Table S2. Putative cis-acting elements in the BnPP2-15-2086 by PLACE.**

| Name of <i>cis</i> -element  | Sequence | Position from translation start site                                                                              | Function                                                                                                |
|------------------------------|----------|-------------------------------------------------------------------------------------------------------------------|---------------------------------------------------------------------------------------------------------|
| 2SSEEDPROTBANAPA             | CAAACAC  | -1247                                                                                                             | Conserved in many storage-protein gene promoters                                                        |
| AACACOREOSGLUB1              | AACAAAC  | -701                                                                                                              | Involved in controlling the endosperm-specific expression                                               |
| ABRE-BOX                     | ACGTG    | -82                                                                                                               | Early responsive to dehydration                                                                         |
| ACGTATERD1                   | ACGT     | -1980 -1783 -1744 -1403 -121                                                                                      | Induction by dehydration stress and dark-induced senescence                                             |
| ARR1AT                       | NGATT    | -1342 -345 -334                                                                                                   | Transcriptional activators                                                                              |
| BIHD1                        | TGTCA    | -1991 -1845 -1436 -809 -597 -255 -153                                                                             | Involved in disease resistance responses                                                                |
| CAATBOX                      | CAAT     | -1925 -1838 -1519 -1232 -1096 -961 -732<br>-645 -636 -340 -291 -64                                                | Sequences responsible for the tissue specific promoter activity                                         |
| CACTFTPPCA1                  | YACT     | -1900 -1860 -1697 -1578 -1486 -1270 -1013<br>-1003 -965 -887 -794 -783 -654 -539 -536<br>-505 -486 -466 -372 -260 | <i>Cis</i> -Regulatory elements for mesophyll-specific gene expression                                  |
| CGACGOSAMY3                  | CGACG    | -832                                                                                                              | May function as a coupling element for the G box element                                                |
| CPBCSPOR                     | TATTAG   | -1075 -476                                                                                                        | Cytokinin-enhanced Protein Binding site                                                                 |
| CURECORECR                   | GTAC     | -1237 -261 -163 -25                                                                                               | Copper- and oxygen-responsive elements                                                                  |
| DPBFCOREDCC3                 | ACACNNG  | -84                                                                                                               | ABA-responsive and embryo-specification element                                                         |
| EBOXBNNAPA                   | CANNTG   | -2062 -2019 -918 -610 -486 -174                                                                                   | <i>Cis</i> -element binding BHLH factor involved in light responsiveness and tissue-specific activation |
| ECCRCRH1                     | GANTTNC  | -1753 -461                                                                                                        | Consensus motif of the two enhancer elements                                                            |
| ERELEE4                      | AWTTCAA  | -707                                                                                                              | Ethylene responsive element                                                                             |
| GARE-BOX                     | TAACARR  | -694 -367                                                                                                         | Gibberellin-responsive element                                                                          |
| GATA-BOX                     | GATA     | -2004 -1805 -1758 -1133 -1054 -1045 -605<br>-322                                                                  | Required for high level, light regulated, and tissue specific expression                                |
| GCN4-BOX                     | TGAGTCA  | -914                                                                                                              | Required for endosperm-specific expression                                                              |
| GT1-BOX                      | GRWAAW   | -1173 -1154 -939 -722 -97                                                                                         | GT-1 binding site in many light-regulated genes                                                         |
| GTGANTG10                    | GTGA     | -1391 -76                                                                                                         | <i>Cis</i> -regulatory elements for late pollen gene                                                    |
| INRNTPSADB                   | YTCANTYY | -1998 -1917 -1896 -820 -656 -342                                                                                  | Light-responsive transcription                                                                          |
| LTRE1HVBLT49                 | CCGAAA   | -311 -133                                                                                                         | Low-temperature-responsive element                                                                      |
| MYB1AT                       | WAACCA   | -741                                                                                                              | MYB recognition site                                                                                    |
| MYBGH1V                      | TAACAAA  | -694                                                                                                              | Central element of gibberellin (GA) response complex                                                    |
| MYBPLANT                     | MACCWAMC | -1254                                                                                                             | Plant MYB binding site                                                                                  |
| MYBST1                       | GGATA    | -439                                                                                                              | Core motif of MybSt1 binding site                                                                       |
| MYCCONSENSUSAT               | CANNTG   | -2062 -2019 -918 -610 -486 -174                                                                                   | MYC recognition site                                                                                    |
| NODCON2GM/<br>OSE2ROOTNODULE | CTCTT    | -650                                                                                                              | Nodule specificity of cis-acting regulatory elements                                                    |
| NTBBF1ARROLB                 | ACTTTA   | -1859                                                                                                             | Required for tissue-specific expression and auxin induction                                             |
| POLLEN1LELAT52               | AGAAA    | -1174 -933 -363                                                                                                   | Responsible for pollen specific activation                                                              |

|                 |         |                                                                                   |                                                                         |
|-----------------|---------|-----------------------------------------------------------------------------------|-------------------------------------------------------------------------|
| PROLAMINBOX     | TGCAAAG | -1280                                                                             | Minimal cis-element requirements for endosperm specific gene expression |
| PYRIMIDINEBOX   | CCTTTT  | -1871                                                                             | Gibberellin-respons cis-element of GARE & involved in sugar repression  |
| RHERPATEXPA7    | KCACGW  | -1785                                                                             | Root Hair-specific cis-Elements                                         |
| ROOTMOTIFTAPOX1 | ATATT   | -1964 -1950 -1829 -1724 -1683 -1660 -1644<br>-1633 -1624 -865 -799 -659 -395 -205 | Root specificity element                                                |
| SREATMSD        | TTATCC  | -1591                                                                             | Sugar-repressive element                                                |
| TATA-BOX        | TATA    | -405                                                                              | Essential for promoter recognition                                      |
| TATCCAOSAMY     | TATCCA  | -1590                                                                             | Element Controls Tissue-Specific Sugar Sensitivity                      |
| TBOXATGAPB      | ACTTTG  | -553                                                                              | Light-activated transcription;                                          |
| TGACGTMAMY      | TGACGT  | -1746                                                                             | Cis-Element for Expression in Cotyledons of Germinated Seeds            |
| W-BOX           | TGACY   | -1574 -787 -1512 -907 -896                                                        | Elicitor-induced activation of transcription via W box-related          |

---

\* N indicates A, C, G or T; W indicates A or T; Y indicates C or T; R indicates A or G.

**Table S3. The sequence of *BnPP2* gene-specific primers**

| Name            | Sequence (5'-3')                                    |
|-----------------|-----------------------------------------------------|
| <i>BnPP2-1</i>  | CACTCCACAATCCCATTCTCT<br>TGTGCATGGTGTATGATCTTCC     |
| <i>BnPP2-2</i>  | GGTTCAAATTTTATGGGGACAAT<br>TCATCTAATAATAGGTTTTTCCT  |
| <i>BnPP2-3</i>  | CCTGAGTGCTAGTTAAATCACCC<br>CCACCAGAACTCAAATCTCTTCC  |
| <i>BnPP2-4</i>  | GATCGTCTGTCTCTATGGGTTT<br>ATAATGACAAATCTTCCTACGTGG  |
| <i>BnPP2-5</i>  | ATGTTACCAGAAGACTGTGTCTCA<br>TGACACTTTCTTGTGGTGGTTAG |
| <i>BnPP2-6</i>  | CACACAAATCCCCTTCTGCATTC<br>TTGATTACATGGTTTCCTCGGCA  |
| <i>BnPP2-7</i>  | AGAGAGCTCAACAATGGAGATGA<br>CTTGAAATGATTGCGACCCTTACA |
| <i>BnPP2-8</i>  | ATGGAAGAAAAGGGACTAATGGACT<br>TCATGCAATCTCCTTGGGGCG  |
| <i>BnPP2-9</i>  | GTTTATGTAAATAAATTAGAATATG<br>CTAATCTTTTGCTGGCTGTATT |
| <i>BnPP2-10</i> | CCGGAATTAGTTGGCGACGAAA<br>GATTATTCGCCATCCGTTTACAC   |
| <i>BnPP2-11</i> | AAAGAGAGCTCAACAATGGAGATGA<br>CAAACAGGGAAACAGTGCCAAG |
| <i>BnPP2-12</i> | GGAGAGAGTTTGAGAGAAGCCC<br>CGATTAACCTGCACGATCACCAT   |
| <i>BnPP2-13</i> | AATCCCTTCAGCGTTTATAGGC<br>CACACTAAGACCTTCCACAAATCAC |
| <i>BnPP2-14</i> | TCGATGGACTTGCAATTGGTG<br>GTGGACTGAGATGAGGCTTGT      |
| <i>BnPP2-15</i> | AGCGTCTCGGAGTACAAGCC<br>TCCAAGCAATTTCTCAATCCC       |

**Table S4. The sequence of gene-specific primers used for qRT-PCR**

| Name       | Sequence (5'-3')       | Length of product (bp) |
|------------|------------------------|------------------------|
| qBnPP2-1F  | CAGTTTTGAGCACACCCACG   | 205                    |
| qBnPP2-1R  | CCTAACTTCGGTCGCAGGT    |                        |
| qBnPP2-2F  | TGGTGGGTGGAAGTATCAGGA  | 187                    |
| qBnPP2-2R  | TGTGGCCGTTGGATGTTGA    |                        |
| qBnPP2-3F  | GCAGGGAAGTACAGCGTCTT   | 220                    |
| qBnPP2-3R  | GATTCACGACCGCAAAGCTC   |                        |
| qBnPP2-4F  | GGGCTTAGCAATCACTGGGA   | 228                    |
| qBnPP2-4R  | TGGATGTTCTCGGTGTTGCA   |                        |
| qBnPP2-5F  | ATCCGCTTCTCATCGATGGT   | 176                    |
| qBnPP2-5R  | TGTTCTCAGCTCAACCACCT   |                        |
| qBnPP2-6F  | GCTGGTTTGAAATCCGTGGC   | 238                    |
| qBnPP2-6R  | CGCAAATGTAGCCCAAGACG   |                        |
| qBnPP2-7F  | GTCTCGGCCAACTAACTGCA   | 217                    |
| qBnPP2-7R  | CTAGCCACCACACGTACGAG   |                        |
| qBnPP2-8F  | CTTGGACCCGGAGAGCTATC   | 193                    |
| qBnPP2-8R  | CGACGTAATGTGTGTATGGGG  |                        |
| qBnPP2-9F  | TGTCAACCCGGTGAATGTGT   | 199                    |
| qBnPP2-9R  | AAGCCCTCTCTTCCATGTGC   |                        |
| qBnPP2-10F | CGAGTTTTACACCACAAGAGCA | 220                    |
| qBnPP2-10R | TCGAAGAAGCTCTGCCACC    |                        |
| qBnPP2-11F | CAGCGGAAGAATGGGGCAAT   | 199                    |
| qBnPP2-11R | TCGCCATCTCAACCTCCAT    |                        |
| qBnPP2-12F | TTGTGTGGGGTAAGGACAGC   | 206                    |
| qBnPP2-12R | GTAAACTTGGCAGCCGTTC    |                        |
| qBnPP2-13F | AGACAGTGGTTGGTTAGCG    | 232                    |
| qBnPP2-13R | AATCACAGAAGACTTTGCGCC  |                        |
| qBnPP2-14F | GCTCACTCAGGGCCTAACAA   | 162                    |
| qBnPP2-14R | CCAACAACAACCGAGGCAAA   |                        |
| qBnPP2-15F | GGCTAAGCTTCACAATGGCG   | 183                    |
| qBnPP2-15R | GCCACTTCCACTCCCTTCTC   |                        |

**Table S5. The primers for constructing binary expression vector**

| Name                | Sequence (5'-3')                                   | Length for product (bp) |
|---------------------|----------------------------------------------------|-------------------------|
| pBnPP2-15-2086      | CAGAGGCTATTCAAGTTTGCGG<br>ATTTGACCCTTTGCTGGGCTTG   | 2 086                   |
| pBnPP2-15-1455      | GTGCTGCTTACGGTTTCCATG<br>ATTTGACCCTTTGCTGGGCTTG    | 1 455                   |
| pBnPP2-15-1039      | TGCACATTATCATGTAATTAA<br>ATTTGACCCTTTGCTGGGCTTG    | 1 039                   |
| pBnPP2-15-579       | GTAAGTCTCGATCATTACATAC<br>ATTTGACCCTTTGCTGGGCTTG   | 579                     |
| <i>GFP-BnPP2-1</i>  | ATGGGCGCGTCGCTGTCTGA<br>CTTCAAACCCCTCTCCGTT        | 894                     |
| <i>GFP-BnPP2-2</i>  | ATGGGGACAATTTTGTCTTGTG<br>TCTTAATAATAGGTTTTTCCTAAA | 891                     |
| <i>GFP-BnPP2-3</i>  | ATGGGAGCCAATGCGTCGTC<br>CAGCAATTCGGCCTCTTTCTCT     | 852                     |
| <i>GFP-BnPP2-4</i>  | ATGGGTTCTGGTTTCTCTCTCT<br>AAAGTGCATTAACCTCCCTCTA   | 876                     |
| <i>GFP-BnPP2-5</i>  | ATGTTACCAGAAGACTGTGT<br>GTTTTTAGGCCTCACTTCAAT      | 840                     |
| <i>GFP-BnPP2-6</i>  | ATGAGAAAAATATTGGGGACGG<br>AGCCTTTTTGGGTCTGATTT     | 957                     |
| <i>GFP-BnPP2-7</i>  | ATGGAGATGAGCAATATACCAG<br>TGCAACACCTTTAGGCCTAAG    | 786                     |
| <i>GFP-BnPP2-8</i>  | ATGGAAGAAAAGGGACTAATGG<br>TGCAATCTCCTTGGGGCG       | 822                     |
| <i>GFP-BnPP2-9</i>  | ATGGGAACAGGGTGGTCAC<br>ATCTTTTGCTGGCTGTATTTTG      | 813                     |
| <i>GFP-BnPP2-10</i> | ATGATAGAAGCAAAGCCTCCT<br>CATCTTTGGCTGTATACTGAC     | 678                     |
| <i>GFP-BnPP2-11</i> | ATGGAGATGAGGAATTTACCAG<br>TGTTCCAGCTTTAGGCCTA      | 894                     |
| <i>GFP-BnPP2-12</i> | ATGGCTGCAAGCAAAGCTCATC<br>ACCCGATTTAGTGACAAGTGGC   | 531                     |
| <i>GFP-BnPP2-13</i> | ATGGAGCTTGGGATCGTCAAA<br>AGCAGGCAAGAGAACTCTAGTC    | 1173                    |
| <i>GFP-BnPP2-14</i> | ATGGACTTGCAATTGGTGAAAA<br>AGCGGCATCAACAGCCA        | 1323                    |
| <i>GFP-BnPP2-15</i> | ATGGGGATTAGTGGATCAAA<br>TATCTTTGGCTGTATTTGAC       | 705                     |

\* Two sequences of homologous sequences were added before the primer sequence of the cloned promoter respectively, “GACCATGATTACGCC**AAGCTT**” for the forward primers and “GGACTGACCACCCGG**GGATCC**” for the reverse primers. Two sequences of homologous sequences were added before the primer sequence of the *GFP-BnPP2s* respectively, “GCTGCGGCAGCGGCC**GAATTC**” for the forward primers and “TTATCTAGATCCGGT**GGATCC**” for the reverse primers. The red font indicates the endonuclease cleavage site.

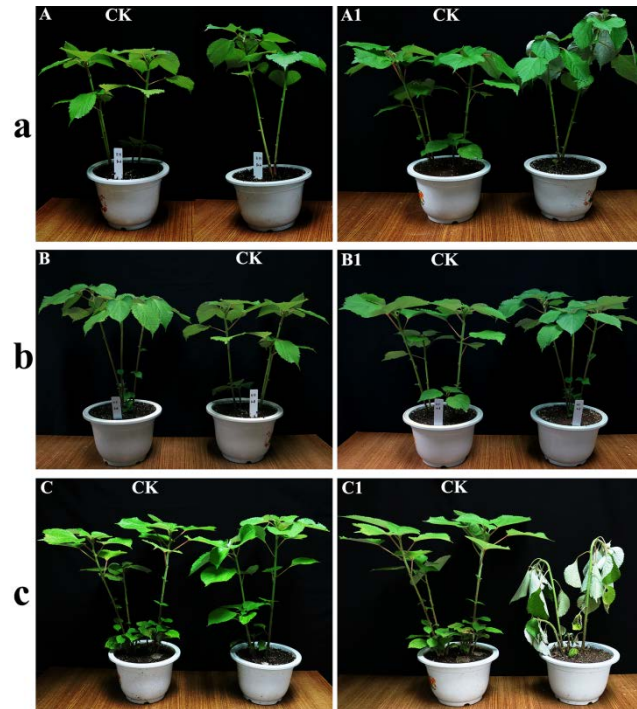

**Fig. S1.** The diagram of low-temperature treatment (LT), high-temperature treatment (HT) and drought stress (DS). “a” represented LT, “b” represented HT and “c” represented DS. A, B and C indicated the status before the test. A1, B1 and C1 indicated the status after the test. CK indicated control.



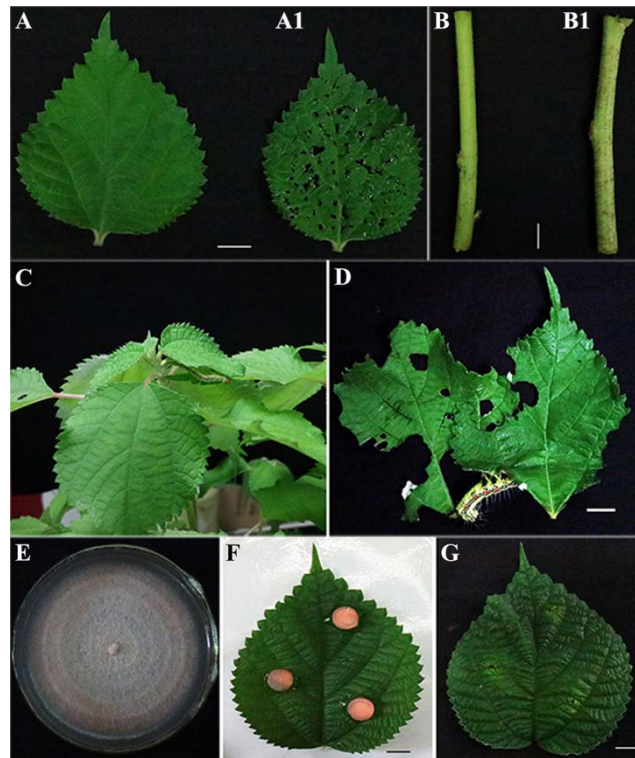

**Fig. S2. The diagram of mechanical wounding treatment (MW), insect-feeding treatment (IF) and fungi infection treatment (FI).** A and B indicated the status of leaves and bark before the test and A1 and B1 indicated the status after the test. C and D represented insect-feeding treatment. E was the the *colletotrichum gloeosporioides* strain isolated from the ramie leaves, F and G represented fungi infection treatment. Bar = 1cm.

**>The promoter region of *BnPP2-15*, 2086 bp**

```
-2 086 CAGAGGCTAT TCAAGTTTGC GGTGCATATG TATTAATGGT GGATCAAGTA GCAACTAATT
-2 026 GGTCTTTCAT TTGGTTTTTC GAGATATTTT CATTTTGTCA TTCCACACGT TTTAATTACA
-1 966 GTATATTTTT TCATCCATAT TTTATTATTT ATTTGATCGT GCAATTAATT TCATTTTTTA
-1 906 TATATATACT TTCATTTTTTC TTTATGTTAT TTTCTCCTTT TTAAGTTACT TTATTTTTCC
-1 846 ATGCATTCA ATTATATATA TTTAATTGGA CTAGTAACT AGATAATTGT GTCTTTTATG
-1 786 AGCACGTTTA TTCATTAATT TCATTATGA TATGATTTTC TGACGTATTG ATGTATTTAA
-1 726 TCATATTGTT ATTACATAAT TATTTTTTTT ACTTTTTATA TATATATTGT TATTGTTTAT
-1 666 GTTATAATAT TGTTATTTAA TCATATTTTT ATTATATTTA TCATATTGTT ATGGTTTATC
-1 606 ACATTGTTTC TTTATTTATC CAAATCTCTA CTTTGTACTA GCATTATTTA TTTAATTTTA
-1 546 ATTTAATTTT TAATTTTTAA TTATAAGCAA TTAATGACTT CACATTCTTT GTCGTTTTTA
-1 486 CACTTCCGTC GTTTTTTTTT TTTTTTTTAT TGTGCTGCTT ACGGTTTCCA TGTCATCTAT
-1 426 GTTTTATGTC GTTTTTCGGT TTTACGTCGT TTTTTGTGAA GCTGTGCTTC TTCGAATGTC
-1 366 GTTTTCATGT TTTGTGCTTT TCCAAGATTG ATGTCGTTTT CTACAAATAT CGTTTTACCG
-1 306 CAAAACAGT GTCGTTTTTT TTTTCTGCA AAGTCCCACT CTCACAAATT AACACCAAAAC
-1 246 AACACCAGG TACACAATAA AATAGCATTT CCAGCTCACA GACCCTCGTA ACTAATTTGG
-1 186 TATTCTTCTC CAAGAAAAAT GTCTTGCGTT ACGAAAAAAA AAAAAACCTA TTTGATATTT
-1 126 GGTCTTTTTT TTGCTTTATG TGTTAATGGT CAATGTTTTT AAAAATTAAT TTATTAGCTA
-1 066 TTTAATACAT AAGATAACTA AGATATATGC ACATTATCAT GTAATTAATA AATTACTAAT
-1 006 TTTTACTATT TTTCTAAAAC ATAATTTAAA AAATAATTAT TTAATCAATT ATTTAAATAA
-946 TAAAATTGAA AAAAGAAATT AAAAAATCA GATGAGTCAT GACTCAGTCA TGACCTTTCT
-886 ACTCTCGTAA TTTTCGGTCA AATATTATAG ATCTCGACCT CAACACCAAG TCAACGACGC
-826 GTTTATTTC A TTTTATATGT CATGTCTATA TTTACTATTT TGACACTAAT ATGTCCTTTC
-766 CAAGAAGAAG CTTCTGCGAC TAGAATAACC AAAGCAATTT CCATGAAAAT TCATCTAAAA
-706 ATTCAAACAA ACTAACAAAA CAAAAATCAA CATTACCAC CATAAATATA TTCACTCTCT
-646 TCAATATTCC CAATTAGAAG TTATAATCAT CTACCTCAAC TGATAATATT GTCATCAACA
-586 AGCGTCTGTA AGTCTCGATC ATTACATACC AAAACTTTGT TTTTACATAC TACTTTTCAT
-526 GAATTTGTTT ATCTTTCTCT GCACTTTTTT TTTTTTTTGG CACTTGCTAG TATTAGCTTT
-466 TACTCGAATT TCTCGGATCA TGTCTTGGA TATATTTGCT ATGGACCTGA AATTTTGGTC
-406 CTTATTTTGA AATATTTAGT TTGTTGAAAA GGTCCACTCT AACAGAAATG TCTTGTTTGA
-346 GAGATTCAAT TTCGATTACA TTCAGATAAT TTTAGCCGAA AGAACATACA AACTTCAATG
-286 GCCAAAATCA AAAGCTATAA ACAGAGTACT CTGTCATCAT TCTTGAATTA TGAGAGTTTT
-226 AGCCTGTGCT TGTTTTTCA CATATTTGAA CATACTATC ATCATATCAT ATCAAATGTA
-166 TGTGTACCTG AATTGTCATA TCACATAGTA AGACCGAAAG GGCATACGTT TTATTATGTG
-106 CAAAATTTG GTTAATTTCT CGACACGTGT GTGATGATGC GTCAATAATG TATATGTTGT
- 46 TTTCATGTTT TTGTAGCGCG AGTACAAGCC CAGCAAAGGG TCAAATATG
```

**Fig. S3. The promoter sequence of *BnPP2-15*.** The initiation codon marked with yellow color was defined as +1. The left numbers indicated the length of the promoter.

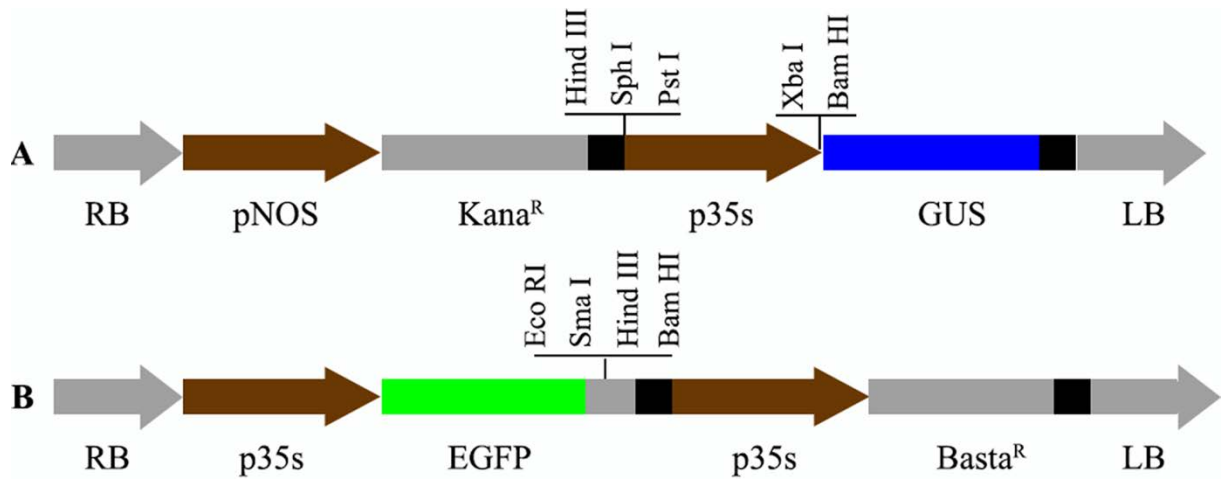

**Fig. S4. T-DNA regions of binary expression plasmid pBI121 and pEGAD.** A represented pBI121 and B represented pEGAD. The relevant restriction sites were labeled on this figure.
